# Supplementary material for: Acute Downregulation but Not Genetic Ablation of Murine MCU Impairs Suppressive Capacity of Regulatory CD4 T Cells
Source: MDPI journal article supplement (doi:10.3390/ijms24097772), 2023-04-24
Supplement: s1 [file s1]

# Supplementary Figure S1

## A

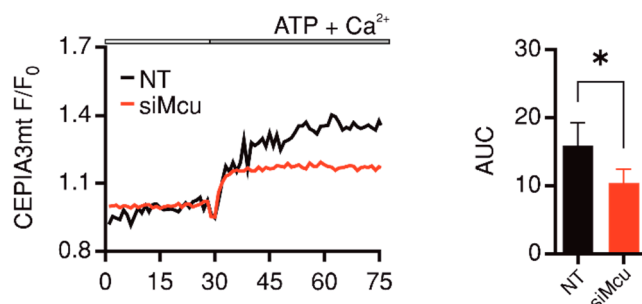

## B

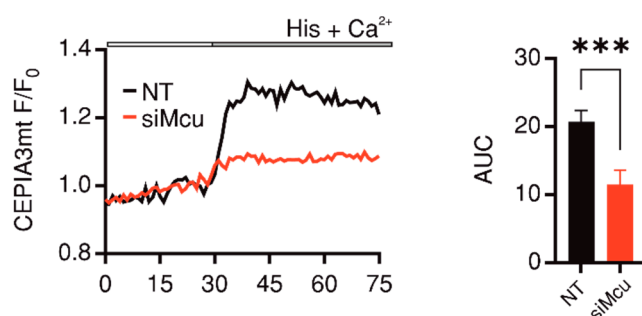

**Figure S1.** Mcu downregulation reduces mitochondrial Ca<sup>2+</sup> uptake. (A) Representative images showing fluorescence of mtCEPIA3 corresponding to mitochondrial Ca<sup>2+</sup> levels before (basal) and after application of 2 mM ATP in EL-4 murine T cell line transfected with non-targeting (NT) or Mcu silencing (siMcu) RNA; Average traces showing changes of fluorescence ratio of mtCEPIA3 over time in cells transfected as in (A) where the mitochondrial Ca<sup>2+</sup> uptake is triggered by application of 2 mM ATP (B) or 100  $\mu$ M Histamine (C). Bar graphs represent averages  $\pm$  S.E.M of area under influx curve (AUC) from 3 independent experiments, and (32-48) cells per condition, \*  $p < 0.05$ , \*\*\*  $p < 0.001$ . 48h before the RNA transfection cells were transduced with viral particles encoding mtCEPIA3.
